# Supplementary material for: A Novel Recovery-Based Suicide Prevention Program in Upstate New York
Source: Atypon-hosted journal article supplement (doi:10.1176/appi.ps.202100162), 2021-10-27
Supplement: appi.ps.202100162.ds001.pdf [file appi.ps.202100162.ds001.pdf]

Online supplement for DOI 10.1176/appi.ps.202100162

**Table 1A.** Participant Characteristics by Treatment Group

| Characteristic & Variable                   | PHRP (N=32) | TAU (N=32) | $\chi^2$             | <i>t</i> | <i>p</i> |
|---------------------------------------------|-------------|------------|----------------------|----------|----------|
| Gender                                      |             |            | 7.23 <sup>a, c</sup> |          | .01      |
| <i>Female</i> , freq (%)                    | 27 (84.4)   | 17 (53.1)  |                      |          |          |
| <i>Male</i> , freq (%)                      | 5 (15.6)    | 15 (46.9)  |                      |          |          |
| Ethnicity                                   |             |            | 1.31 <sup>b</sup>    |          | .52      |
| <i>Black or African-American</i> , freq (%) | 3 (9.4)     | 4 (12.5)   |                      |          |          |
| <i>White</i> , freq (%)                     | 28 (87.5)   | 25 (78.1)  |                      |          |          |
| <i>Hispanic or Latino</i> , freq (%)        | 1 (3.1)     | 3 (9.4)    |                      |          |          |
| Marital status                              |             |            | 1.36 <sup>b</sup>    |          | .51      |
| <i>Married</i> , freq (%)                   | 3 (9.4)     | 2 (6.3)    |                      |          |          |
| <i>Separated or Divorced</i> , freq (%)     | 3 (9.4)     | 1 (3.1)    |                      |          |          |
| <i>Never Married</i> , freq (%)             | 26 (81.3)   | 29 (90.6)  |                      |          |          |
| Employment                                  |             |            | 4.80 <sup>b</sup>    |          | .09      |
| <i>Unemployed</i> , freq (%)                | 8 (25.0)    | 16 (50.0)  |                      |          |          |
| <i>Part-Time</i> , freq (%)                 | 5 (15.6)    | 5 (15.6)   |                      |          |          |
| <i>Full-Time</i> , freq (%)                 | 19 (59.4)   | 11 (34.4)  |                      |          |          |
| Inpatient Discharge Diagnosis               |             |            |                      |          |          |
| <i>Trauma</i> , freq (%)                    | 13 (40.6)   | 12 (37.5)  | .07 <sup>a</sup>     |          | .80      |
| <i>Substance Use Disorder</i> , freq (%)    | 12 (37.5)   | 12 (37.5)  | .00 <sup>a</sup>     |          | 1.00     |
| <i>Depression</i> , freq (%)                | 24 (75)     | 26 (81.3)  | .37 <sup>a</sup>     |          | .55      |
| <i>Anxiety</i> , freq (%)                   | 13 (40.6)   | 14 (43.8)  | .06 <sup>a</sup>     |          | .80      |
| <i>Bipolar</i> , freq (%)                   | 4 (12.5)    | 1 (3.1)    | 1.95 <sup>a</sup>    |          | .16      |
| <i>Borderline</i> , freq (%)                |             |            | 7.05 <sup>b, c</sup> |          | .03      |
| <i>Traits</i> , freq (%)                    | 6 (18.8)    | 5 (15.6)   |                      |          |          |
| <i>Diagnosis</i> , freq (%)                 | 19 (59.3)   | 10 (31.3)  |                      |          |          |

|                                                                            |              |              |                      |       |
|----------------------------------------------------------------------------|--------------|--------------|----------------------|-------|
| Family History of Suicide Attempts                                         |              |              | 3.19 <sup>b</sup>    | .20   |
| <i>No Family History</i>                                                   | 25 (78.1)    | 22 (68.8)    |                      |       |
| <i>History in 1<sup>st</sup>/2<sup>nd</sup> Degree Relatives, freq (%)</i> | 7 (21.9)     | 7 (21.9)     |                      |       |
| <i>No Information in Record, freq (%)</i>                                  | 0 (0)        | 3 (9.4)      |                      |       |
| Lethality of Prior Suicide Attempts                                        |              |              | 3.20 <sup>b</sup>    | .20   |
| <i>No Prior Suicide Attempts, freq (%)</i>                                 | 20 (62.5)    | 26 (81.3)    |                      |       |
| <i>Low Lethality, freq (%)</i>                                             | 4 (12.5)     | 3 (9.4)      |                      |       |
| <i>High Lethality, freq (%)</i>                                            | 8 (25.0)     | 3 (9.4)      |                      |       |
| Suicide Attempt within 90 days of Admission                                | 12 (37.5)    | 8 (25.0)     | 1.16 <sup>a</sup>    | .28   |
| Family Support                                                             |              |              | 9.16 <sup>b, c</sup> | .01   |
| <i>No Support, freq (%)</i>                                                | 2 (6.3)      | 12 (37.5)    |                      |       |
| <i>Some Support, freq (%)</i>                                              | 22 (68.8)    | 15 (46.9)    |                      |       |
| <i>Excellent Support, freq (%)</i>                                         | 8 (25.0)     | 5 (15.6)     |                      |       |
| Age, mean ( <i>SD</i> )                                                    | 25.4 (6.5)   | 28.1 (7.3)   | -1.57 <sup>a</sup>   | .08   |
| Inpatient Length of Stay, mean ( <i>SD</i> )                               | 6.97 (5.13)  | 6.72 (3.65)  | .23 <sup>a</sup>     | .82   |
| Prior Suicide Attempts, mean ( <i>SD</i> )                                 | 1.78 (1.04)  | 1.22 (1.13)  | 2.07 <sup>a, c</sup> | .04   |
| PHQ-9 Full Scale                                                           | 20.81 (4.13) | 15.00 (5.98) | 4.52 <sup>a, c</sup> | <.001 |
| Item 9: Suicidality                                                        | 2.03 (.93)   | 1.28 (1.02)  | 3.06 <sup>a, c</sup> | .003  |

**Note.** PHQ-9 = Patient Health Questionnaire-9, Item 9: Thoughts that you would be better off dead, or of hurting yourself. <sup>a</sup> df=1. <sup>b</sup> df=2. <sup>c</sup> Included in multivariate analyses of predictors of rehospitalization.
